# Supplementary material
Source: ML conference proceedings conference paper supplement (https://proceedings.neurips.cc/paper_files/paper/2018/hash/335cd1b90bfa4ee70b39d08a4ae0cf2d-Abstract.html)
Supplement: Supplementary file [file 335cd1b90bfa4ee70b39d08a4ae0cf2d-Supplemental.zip]

---

# The promises and pitfalls of Stochastic Gradient Langevin Dynamics

SUPPLEMENTARY DOCUMENT

---

**Nicolas Brosse, Éric Moulines**

Centre de Mathématiques Appliquées, UMR 7641,  
Ecole Polytechnique, Palaiseau, France.

nicolas.brosse@polytechnique.edu, eric.moulines@polytechnique.edu

**Alain Durmus**

Ecole Normale Supérieure CMLA,  
61 Av. du Président Wilson 94235 Cachan Cedex, France.  
alain.durmus@cmla.ens-cachan.fr

## 1 Proofs of Section 3.1

### 1.1 Proof of Lemma 1

The convergence in Wasserstein distance is classically done via a standard synchronous coupling [Dieuleveut et al., 2017, Proposition 2]. We prove the statement for SGLD; the adaptation for LMC, SGLDFP and SGD is immediate. Let  $\gamma \in (0, 2/L)$  and  $\lambda_1, \lambda_2 \in \mathcal{P}_2(\mathbb{R}^d)$ . By [Villani, 2009, Theorem 4.1], there exists a couple of random variables  $(\theta_0^{(1)}, \theta_0^{(2)})$  such that  $W_2^2(\lambda_1, \lambda_2) = \mathbb{E} \left[ \left\| \theta_0^{(1)} - \theta_0^{(2)} \right\|^2 \right]$ . Let  $(\theta_k^{(1)}, \theta_k^{(2)})_{k \in \mathbb{N}}$  be the SGLD iterates starting from  $\theta_0^{(1)}$  and  $\theta_0^{(2)}$  respectively and driven by the same noise, *i.e.* for all  $k \in \mathbb{N}$ ,

$$\begin{cases} \theta_{k+1}^{(1)} &= \theta_k^{(1)} - \gamma \left\{ \nabla U_0(\theta_k^{(1)}) + (N/p) \sum_{i \in S_{k+1}} \nabla U_i(\theta_k^{(1)}) \right\} + \sqrt{2\gamma} Z_{k+1}, \\ \theta_{k+1}^{(2)} &= \theta_k^{(2)} - \gamma \left\{ \nabla U_0(\theta_k^{(2)}) + (N/p) \sum_{i \in S_{k+1}} \nabla U_i(\theta_k^{(2)}) \right\} + \sqrt{2\gamma} Z_{k+1}, \end{cases}$$

where  $(Z_k)_{k \geq 1}$  is an i.i.d. sequence of standard Gaussian variables and  $(S_k)_{k \geq 1}$  an i.i.d. sequence of subsamples of  $\{1, \dots, N\}$  of size  $p$ . Denote by  $(\mathcal{F}_k)_{k \in \mathbb{N}}$  the filtration associated to  $(\theta_k^{(1)}, \theta_k^{(2)})_{k \in \mathbb{N}}$ . We have for  $k \in \mathbb{N}$ ,

$$\begin{aligned} \left\| \theta_{k+1}^{(1)} - \theta_{k+1}^{(2)} \right\|^2 &= \\ \left\| \theta_k^{(1)} - \theta_k^{(2)} \right\|^2 &+ \gamma^2 \left\| \nabla U_0(\theta_k^{(1)}) + \frac{N}{p} \sum_{i \in S_{k+1}} \nabla U_i(\theta_k^{(1)}) - \nabla U_0(\theta_k^{(2)}) - \frac{N}{p} \sum_{i \in S_{k+1}} \nabla U_i(\theta_k^{(2)}) \right\|^2 \\ &- 2\gamma \left\langle \theta_k^{(1)} - \theta_k^{(2)}, \nabla U_0(\theta_k^{(1)}) + \frac{N}{p} \sum_{i \in S_{k+1}} \nabla U_i(\theta_k^{(1)}) - \nabla U_0(\theta_k^{(2)}) - \frac{N}{p} \sum_{i \in S_{k+1}} \nabla U_i(\theta_k^{(2)}) \right\rangle. \end{aligned}$$

By **H1** and **H3**,  $\theta \mapsto \nabla U_0(\theta) + (N/p) \sum_{i \in S} \nabla U_i(\theta)$  is  $\mathbb{P}$ -a.s.  $L$ -co-coercive Zhu and Marcotte [1996]. Taking the conditional expectation w.r.t.  $\mathcal{F}_k$ , we obtain

$$\mathbb{E} \left[ \left\| \theta_{k+1}^{(1)} - \theta_{k+1}^{(2)} \right\|^2 \middle| \mathcal{F}_k \right] \leq \left\| \theta_k^{(1)} - \theta_k^{(2)} \right\|^2 - 2\gamma \{1 - (\gamma L)/2\} \left\langle \theta_k^{(1)} - \theta_k^{(2)}, \nabla U(\theta_k^{(1)}) - \nabla U(\theta_k^{(2)}) \right\rangle,$$

and by **H2**

$$\mathbb{E} \left[ \left\| \theta_{k+1}^{(1)} - \theta_{k+1}^{(2)} \right\|^2 \middle| \mathcal{F}_k \right] \leq \{1 - 2m\gamma(1 - (\gamma L)/2)\} \left\| \theta_k^{(1)} - \theta_k^{(2)} \right\|^2 .$$

Since for all  $k \geq 0$ ,  $(\theta_k^{(1)}, \theta_k^{(2)})$  belongs to  $\Pi(\lambda_1 R_{\text{SGLD}}^k, \lambda_2 R_{\text{SGLD}}^k)$ , we get by a straightforward induction

$$W_2^2(\lambda_1 R_{\text{SGLD}}^k, \lambda_2 R_{\text{SGLD}}^k) \leq \mathbb{E} \left[ \left\| \theta_k^{(1)} - \theta_k^{(2)} \right\|^2 \right] \leq \{1 - 2m\gamma(1 - (\gamma L)/2)\}^k W_2^2(\lambda_1, \lambda_2) . \quad (\text{S1})$$

By **H1**,  $\lambda_1 R_{\text{SGLD}} \in \mathcal{P}_2(\mathbb{R}^d)$  and taking  $\lambda_2 = \lambda_1 R_{\text{SGLD}}$ , we get  $\sum_{k=0}^{+\infty} W_2^2(\lambda_1 R_{\text{SGLD}}^k, \lambda_1 R_{\text{SGLD}}^{k+1}) < +\infty$ . By [Villani, 2009, Theorem 6.16],  $\mathcal{P}_2(\mathbb{R}^d)$  endowed with  $W_2$  is a Polish space.  $(\lambda_1 R_{\text{SGLD}}^k)_{k \geq 0}$  is a Cauchy sequence and converges to a limit  $\pi_{\text{SGLD}}^{\lambda_1} \in \mathcal{P}_2(\mathbb{R}^d)$ . The limit  $\pi_{\text{SGLD}}^{\lambda_1}$  does not depend on  $\lambda_1$  because, given  $\lambda_2 \in \mathcal{P}_2(\mathbb{R}^d)$ , by the triangle inequality

$$W_2(\pi_{\text{SGLD}}^{\lambda_1}, \pi_{\text{SGLD}}^{\lambda_2}) \leq W_2(\pi_{\text{SGLD}}^{\lambda_1}, \lambda_1 R_{\text{SGLD}}^k) + W_2(\lambda_1 R_{\text{SGLD}}^k, \lambda_2 R_{\text{SGLD}}^k) + W_2(\pi_{\text{SGLD}}^{\lambda_2}, \lambda_2 R_{\text{SGLD}}^k) .$$

Taking the limit  $k \rightarrow +\infty$ , we get  $W_2(\pi_{\text{SGLD}}^{\lambda_1}, \pi_{\text{SGLD}}^{\lambda_2}) = 0$ . The limit is thus the same for all initial distributions and is denoted  $\pi_{\text{SGLD}}$ .  $\pi_{\text{SGLD}}$  is invariant for  $R_{\text{SGLD}}$  since we have for all  $k \in \mathbb{N}^*$ ,

$$W_2(\pi_{\text{SGLD}}, \pi_{\text{SGLD}} R_{\text{SGLD}}) \leq W_2(\pi_{\text{SGLD}}, \pi_{\text{SGLD}} R_{\text{SGLD}}^k) + W_2(\pi_{\text{SGLD}} R_{\text{SGLD}}, \pi_{\text{SGLD}} R_{\text{SGLD}}^k) .$$

Taking the limit  $k \rightarrow +\infty$ , we obtain  $W_2(\pi_{\text{SGLD}}, \pi_{\text{SGLD}} R_{\text{SGLD}}) = 0$ . Using (S1),  $\pi_{\text{SGLD}}$  is the unique invariant probability measure for  $R_{\text{SGLD}}$ .

## 1.2 Proof of Theorem 2

Proof of i). Let  $\gamma \in (0, 1/L]$  and  $\lambda_1, \lambda_2 \in \mathcal{P}_2(\mathbb{R}^d)$ . By [Villani, 2009, Theorem 4.1], there exists a couple of random variables  $(\theta_0, \vartheta_0)$  such that  $W_2^2(\lambda_1, \lambda_2) = \mathbb{E} [\|\theta_0 - \vartheta_0\|^2]$ . Let  $(\theta_k, \vartheta_k)_{k \in \mathbb{N}}$  be the LMC and SGLDFP iterates starting from  $\theta_0$  and  $\vartheta_0$  respectively and driven by the same noise, i.e. for all  $k \in \mathbb{N}$ ,

$$\begin{cases} \theta_{k+1} &= \theta_k - \gamma \nabla U(\theta_k) + \sqrt{2\gamma} Z_{k+1} , \\ \vartheta_{k+1} &= \vartheta_k - \gamma \left( \nabla U_0(\vartheta_k) - \nabla U_0(\theta^*) + (N/p) \sum_{i \in S_{k+1}} \{ \nabla U_i(\vartheta_k) - \nabla U_i(\theta^*) \} \right) + \sqrt{2\gamma} Z_{k+1} , \end{cases}$$

where  $(Z_k)_{k \geq 1}$  is an i.i.d. sequence of standard Gaussian variables and  $(S_k)_{k \geq 1}$  an i.i.d. sequence of subsamples with replacement of  $\{1, \dots, N\}$  of size  $p$ . Denote by  $(\mathcal{F}_k)_{k \in \mathbb{N}}$  the filtration associated to  $(\theta_k, \vartheta_k)_{k \in \mathbb{N}}$ . We have for  $k \in \mathbb{N}$ ,

$$\mathbb{E} \left[ \left\| \theta_{k+1} - \vartheta_{k+1} \right\|^2 \middle| \mathcal{F}_k \right] = \left\| \theta_k - \vartheta_k \right\|^2 - 2\gamma \langle \theta_k - \vartheta_k, \nabla U(\theta_k) - \nabla U(\vartheta_k) \rangle + \gamma^2 A \quad (\text{S2})$$

where

$$\begin{aligned} A &= \mathbb{E} \left[ \left\| \nabla U(\theta_k) - \left( \nabla U_0(\vartheta_k) - \nabla U_0(\theta^*) + (N/p) \sum_{i \in S_{k+1}} \{ \nabla U_i(\vartheta_k) - \nabla U_i(\theta^*) \} \right) \right\|^2 \middle| \mathcal{F}_k \right] \\ &= A_1 + A_2 , \\ A_1 &= \left\| \nabla U(\theta_k) - \nabla U(\vartheta_k) \right\|^2 , \\ A_2 &= \mathbb{E} \left[ \left\| \nabla U(\vartheta_k) - \left( \nabla U_0(\vartheta_k) - \nabla U_0(\theta^*) + (N/p) \sum_{i \in S_{k+1}} \{ \nabla U_i(\vartheta_k) - \nabla U_i(\theta^*) \} \right) \right\|^2 \middle| \mathcal{F}_k \right] . \end{aligned}$$

Denote by  $W$  the random variable equal to  $\nabla U_i(\vartheta_k) - \nabla U_i(\theta^*) - (1/N) \sum_{j=1}^N \{ \nabla U_j(\vartheta_k) - \nabla U_j(\theta^*) \}$  for  $i \in \{1, \dots, N\}$  with probability  $1/N$ . By **H1** and using the fact that the subsamples  $(S_k)_{k \geq 1}$  are drawn with replacement, we obtain

$$A_2 = (N^2/p) \mathbb{E} \left[ \|W\|^2 \middle| \mathcal{F}_k \right] \leq (L^2/p) \left\| \vartheta_k - \theta^* \right\|^2 .$$

Combining it with (S2), and using the  $L$ -co-coercivity of  $\nabla U$  under **H1** and **H2**, we get

$$\mathbb{E} \left[ \|\theta_{k+1} - \vartheta_{k+1}\|^2 \middle| \mathcal{F}_k \right] \leq (1 - m\gamma) \|\theta_k - \vartheta_k\|^2 + \{(L^2\gamma^2)/p\} \|\vartheta_k - \theta^*\|^2 .$$

Iterating and using Lemma S1-i), we have for  $n \in \mathbb{N}$

$$\begin{aligned} W_2^2(\lambda_1 R_{\text{LMC}}^n, \lambda_2 R_{\text{FP}}^n) &\leq \mathbb{E} \left[ \|\theta_n - \vartheta_n\|^2 \right] \\ &\leq (1 - m\gamma)^n W_2^2(\lambda_1, \lambda_2) + \frac{L^2\gamma^2}{p} \sum_{k=0}^{n-1} (1 - m\gamma)^{n-1-k} \mathbb{E} \left[ \|\vartheta_k - \theta^*\|^2 \right] \\ &\leq (1 - m\gamma)^n W_2^2(\lambda_1, \lambda_2) + \frac{L^2\gamma^2}{p} n (1 - m\gamma)^{n-1} \int_{\mathbb{R}^d} \|\vartheta - \theta^*\|^2 \lambda_2(d\vartheta) + \frac{2L^2\gamma d}{pm^2} . \end{aligned}$$

Proof of ii). Denote by  $\kappa = (2mL)/(m+L)$ . By **H1**, **H2** and [Durmus and Moulines, 2016, Theorem 5], we have for all  $n \in \mathbb{N}$ ,

$$\begin{aligned} W_2^2(\lambda_1 P_{n\gamma}, \lambda_2 R_{\text{LMC}}^n) &\leq 2(1 - \kappa\gamma/2)^n W_2^2(\lambda_1, \lambda_2) + \frac{2L^2\gamma}{\kappa} (\kappa^{-1} + \gamma) \left( 2d + \frac{dL^2\gamma^2}{6} \right) \\ &\quad + L^4\gamma^3(\kappa^{-1} + \gamma) \sum_{k=1}^n \delta_k \{1 - \kappa\gamma/2\}^{n-k} \end{aligned}$$

where for all  $k \in \{1, \dots, n\}$ ,

$$\delta_k \leq e^{-2m(k-1)\gamma} \int_{\mathbb{R}^d} \|\vartheta - \theta^*\|^2 \lambda_1(d\vartheta) + d/m .$$

We get the result by straightforward simplifications and using  $\gamma \leq 1/L$ .

Proof of iii). Let  $\gamma \in (0, 1/L]$  and  $\lambda_1, \lambda_2 \in \mathcal{P}_2(\mathbb{R}^d)$ . By [Villani, 2009, Theorem 4.1], there exists a couple of random variables  $(\theta_0, \vartheta_0)$  such that  $W_2^2(\lambda_1, \lambda_2) = \mathbb{E} \left[ \|\theta_0 - \vartheta_0\|^2 \right]$ . Let  $(\theta_k, \vartheta_k)_{k \in \mathbb{N}}$  be the SGLD and SGD iterates starting from  $\theta_0$  and  $\vartheta_0$  respectively and driven by the same noise, *i.e.* for all  $k \in \mathbb{N}$ ,

$$\begin{cases} \theta_{k+1} &= \theta_k - \gamma \left( \nabla U_0(\theta_k) + (N/p) \sum_{i \in S_{k+1}} \nabla U_i(\theta_k) \right) + \sqrt{2\gamma} Z_{k+1} , \\ \vartheta_{k+1} &= \vartheta_k - \gamma \left( \nabla U_0(\vartheta_k) + (N/p) \sum_{i \in S_{k+1}} \nabla U_i(\vartheta_k) \right) , \end{cases}$$

where  $(Z_k)_{k \geq 1}$  is an i.i.d. sequence of standard Gaussian variables and  $(S_k)_{k \geq 1}$  an i.i.d. sequence of subsamples with replacement of  $\{1, \dots, N\}$  of size  $p$ . Denote by  $(\mathcal{F}_k)_{k \in \mathbb{N}}$  the filtration associated to  $(\theta_k, \vartheta_k)_{k \in \mathbb{N}}$ . We have for  $k \in \mathbb{N}$ ,

$$\begin{aligned} \mathbb{E} \left[ \|\theta_{k+1} - \vartheta_{k+1}\|^2 \middle| \mathcal{F}_k \right] &= \|\theta_k - \vartheta_k\|^2 - 2\gamma \langle \theta_k - \vartheta_k, \nabla U(\theta_k) - \nabla U(\vartheta_k) \rangle + 2\gamma d \\ &\quad + \gamma^2 \mathbb{E} \left[ \left\| \nabla U_0(\theta_k) + (N/p) \sum_{i \in S_{k+1}} \nabla U_i(\theta_k) - \nabla U_0(\vartheta_k) - (N/p) \sum_{i \in S_{k+1}} \nabla U_i(\vartheta_k) \right\|^2 \middle| \mathcal{F}_k \right] . \end{aligned}$$

By **H1** and **H3**,  $\theta \mapsto \nabla U_0(\theta) + (N/p) \sum_{i \in S} \nabla U_i(\theta)$  is  $\mathbb{P}$ -a.s.  $L$ -co-coercive and we obtain

$$\mathbb{E} \left[ \|\theta_{k+1} - \vartheta_{k+1}\|^2 \middle| \mathcal{F}_k \right] \leq \{1 - 2m\gamma(1 - \gamma L/2)\} \|\theta_k - \vartheta_k\|^2 + 2\gamma d ,$$

which concludes the proof by a straightforward induction.

### 1.3 Proof of Theorem 4

Proof of i). Let  $\gamma \in \left( 0, \Sigma^{-1} \{1 + N/(p \sum_{i=1}^N x_i^2)\}^{-1} \right]$ ,  $(\theta_k)_{k \in \mathbb{N}}$  be the iterates of SGLD (3) started at  $\theta^*$  and  $(\mathcal{F}_k)_{k \in \mathbb{N}}$  the associated filtration. For all  $k \in \mathbb{N}$ ,  $\mathbb{E}[\theta_k] = \theta^*$ . The variance of  $\theta_k$  satisfies

the following recursion for  $k \in \mathbb{N}$

$$\begin{aligned} & \mathbb{E} [(\theta_{k+1} - \theta^*)^2 | \mathcal{F}_k] \\ &= \mathbb{E} \left[ \left\{ \theta_k - \theta^* - \gamma (\Sigma(\theta_k - \theta^*) + \rho(S_{k+1})(\theta_k - \theta^*) + \xi(S_{k+1})) + \sqrt{2\gamma} Z_{k+1} \right\}^2 \middle| \mathcal{F}_k \right] \\ &= \mu(\theta_k - \theta^*)^2 + 2\gamma + \gamma^2 A, \end{aligned}$$

where

$$\mu = \mathbb{E} \left[ \left\{ 1 - \gamma \left( \frac{1}{\sigma_\theta^2} + \frac{N}{\sigma_y^2 p} \sum_{i \in S} x_i^2 \right) \right\}^2 \right], \quad A = \mathbb{E} \left[ \left\{ \frac{\theta^*}{\sigma_\theta^2} + \frac{N}{\sigma_y^2 p} \sum_{i \in S} (x_i \theta^* - y_i) x_i \right\}^2 \right].$$

We have for  $\mu$ ,

$$\begin{aligned} \mu &= 1 - 2\gamma\Sigma + \gamma^2 \mathbb{E} \left[ \left\{ \frac{N}{\sigma_y^2 p} \sum_{i \in S} x_i^2 - \frac{1}{\sigma_y^2} \sum_{i=1}^N x_i^2 \right\}^2 \right] + \gamma^2 \Sigma^2 \\ &= 1 - 2\gamma\Sigma + \gamma^2 \left\{ \Sigma^2 + \frac{N}{\sigma_y^4 p} \sum_{i=1}^N \left( x_i^2 - \frac{1}{N} \sum_{j=1}^N x_j^2 \right) \right\} \leq 1 - \gamma\Sigma, \end{aligned}$$

and for  $A$ ,

$$A = \frac{N}{p} \sum_{i=1}^N \left\{ \frac{(x_i \theta^* - y_i) x_i}{\sigma_y^2} + \frac{\theta^*}{N \sigma_\theta^2} \right\}^2.$$

By a straightforward induction, we obtain that the variance of the  $n^{\text{th}}$  iterate of SGLD started at  $\theta^*$  is for  $n \in \mathbb{N}^*$

$$\int_{\mathbb{R}} (\theta - \theta^*)^2 R_{\text{SGLD}}^n(\theta^*, d\theta) = \frac{1 - \mu^n}{1 - \mu} 2\gamma + \frac{1 - \mu^n}{1 - \mu} \frac{N\gamma^2}{p} \sum_{i=1}^N \left\{ \frac{(x_i \theta^* - y_i) x_i}{\sigma_y^2} + \frac{\theta^*}{N \sigma_\theta^2} \right\}^2.$$

For SGLDFP, the additive part of the noise in the stochastic gradient disappears and we obtain similarly for  $n \in \mathbb{N}^*$

$$\int_{\mathbb{R}} (\theta - \theta^*)^2 R_{\text{FP}}^n(\theta^*, d\theta) = \frac{1 - \mu^n}{1 - \mu} 2\gamma.$$

To conclude, we use that for two probability measures with given mean and covariance matrices, the Wasserstein distance between the two Gaussians with these respective parameters is a lower bound for the Wasserstein distance between the two measures [Gelbrich, Theorem 2.1].

The proof of ii) is straightforward.

## 2 Proofs of Section 3.2

### 2.1 Proof of Proposition 5

Let  $\theta$  be distributed according to  $\pi$ . By **H2**, for all  $\vartheta \in \mathbb{R}^d$ ,  $U(\vartheta) \geq U(\theta^*) + (m/2) \|\vartheta - \theta^*\|^2$  and  $\mathbb{E}[\nabla U(\theta)] = 0$ . By a Taylor expansion of  $\nabla U$  around  $\theta^*$ , we obtain

$$0 = \mathbb{E}[\nabla U(\theta)] = \nabla^2 U(\theta^*) (\mathbb{E}[\theta] - \theta^*) + (1/2) \text{D}^3 U(\theta^*) [\mathbb{E}[(\theta - \theta^*)^{\otimes 2}]] + \mathbb{E}[\mathcal{R}_1(\theta)],$$

where by **H1**,  $\mathcal{R}_1 : \mathbb{R}^d \rightarrow \mathbb{R}^d$  satisfies

$$\sup_{\vartheta \in \mathbb{R}^d} \left\{ \|\mathcal{R}_1(\vartheta)\| / \|\vartheta - \theta^*\|^3 \right\} \leq L/6. \quad (\text{S3})$$

Rearranging the terms, we get

$$\mathbb{E}[\theta] - \theta^* = -(1/2) \nabla^2 U(\theta^*)^{-1} \text{D}^3 U(\theta^*) [\mathbb{E}[(\theta - \theta^*)^{\otimes 2}]] - \nabla^2 U(\theta^*)^{-1} \mathbb{E}[\mathcal{R}_1(\theta)].$$

To estimate the covariance matrix of  $\pi$  around  $\theta^*$ , we start again from the Taylor expansion of  $\nabla U$  around  $\theta^*$  and we obtain

$$\mathbb{E} [\nabla U(\theta)^{\otimes 2}] = \mathbb{E} \left[ (\nabla^2 U(\theta^*)(\theta - \theta^*) + \mathcal{R}_2(\theta))^{\otimes 2} \right] = \nabla^2 U(\theta^*)^{\otimes 2} \mathbb{E} [(\theta - \theta^*)^{\otimes 2}] + \mathbb{E} [\mathcal{R}_3(\theta)] \quad (\text{S4})$$

where by **H1**,  $\mathcal{R}_2 : \mathbb{R}^d \rightarrow \mathbb{R}^d$  satisfies

$$\sup_{\vartheta \in \mathbb{R}^d} \left\{ \|\mathcal{R}_2(\vartheta)\| / \|\vartheta - \theta^*\|^2 \right\} \leq L/2, \quad (\text{S5})$$

and  $\mathcal{R}_3 : \mathbb{R}^d \rightarrow \mathbb{R}^{d \times d}$  is defined for all  $\vartheta \in \mathbb{R}^d$  by

$$\mathcal{R}_3(\vartheta) = \nabla^2 U(\theta^*)(\vartheta - \theta^*) \otimes \mathcal{R}_2(\vartheta) + \mathcal{R}_2(\vartheta) \otimes \nabla^2 U(\theta^*)(\vartheta - \theta^*) + \mathcal{R}_2(\vartheta)^{\otimes 2}. \quad (\text{S6})$$

$\mathbb{E} [\nabla U(\theta)^{\otimes 2}]$  is the Fisher information matrix and by a Taylor expansion of  $\nabla^2 U$  around  $\theta^*$  and an integration by parts,

$$\mathbb{E} [\nabla U(\theta)^{\otimes 2}] = \mathbb{E} [\nabla^2 U(\theta)] = \nabla^2 U(\theta^*) + \mathbb{E} [\mathcal{R}_4(\theta)]$$

where by **H1**,  $\mathcal{R}_4 : \mathbb{R}^d \rightarrow \mathbb{R}^{d \times d}$  satisfies

$$\sup_{\vartheta \in \mathbb{R}^d} \left\{ \|\mathcal{R}_4(\vartheta)\| / \|\vartheta - \theta^*\| \right\} \leq L. \quad (\text{S7})$$

Combining this result, (S3), (S4), (S5), (S6), (S7) and  $\mathbb{E}[\|\theta - \theta^*\|^4] \leq d(d+2)/m^2$  by [Brosse et al., 2017, Lemma 9] conclude the proof.

## 2.2 Proofs of Theorem 6 and Theorem 7

First note that under **H1**, **H2** and **H3**, there exists  $r \in [0, L/(\sqrt{p}m)]$  such that

$$K \preceq r^2 (\nabla^2 U(\theta^*))^{\otimes 2}, \quad (\text{S8})$$

i.e. for all  $A \in \mathbb{R}^{d \times d}$ ,

$$\text{Tr}(A^T K(A)) \leq r^2 \text{Tr}(A^T (\nabla^2 U(\theta^*))^{\otimes 2} A),$$

and where  $K$  is defined in (7). In addition, if  $\liminf_{N \rightarrow +\infty} N^{-1}m > 0$ ,  $r$  can be chosen independently of  $N$ .

Moreover, for all  $\gamma \in (0, 2/L)$ ,  $H$  defined in (8), is invertible and for all  $\gamma \in (0, 2/\{(1+r^2)L\})$ ,  $G$  defined in (9), is invertible. Indeed,

$$\begin{aligned} H &= \nabla^2 U(\theta^*) \otimes \left( \text{Id} - \frac{\gamma}{2} \nabla^2 U(\theta^*) \right) + \left( \text{Id} - \frac{\gamma}{2} \nabla^2 U(\theta^*) \right) \otimes \nabla^2 U(\theta^*) \succ 0, \\ G &\succeq \nabla^2 U(\theta^*) \otimes \text{Id} + \text{Id} \otimes \nabla^2 U(\theta^*) - \gamma(1+r^2) \nabla^2 U(\theta^*) \otimes \nabla^2 U(\theta^*) \\ &\succeq \nabla^2 U(\theta^*) \otimes \left( \text{Id} - \frac{\gamma(1+r^2)}{2} \nabla^2 U(\theta^*) \right) + \left( \text{Id} - \frac{\gamma(1+r^2)}{2} \nabla^2 U(\theta^*) \right) \otimes \nabla^2 U(\theta^*) \succ 0. \end{aligned}$$

For simplicity of notation, in this Section, we use  $\epsilon(\theta)$  to denote the difference between the stochastic and the exact gradients at  $\theta \in \mathbb{R}^d$ . More precisely,  $\epsilon$  is the null function for LMC and is defined for  $\theta \in \mathbb{R}^d$  by

$$\epsilon(\theta) = \frac{N}{p} \sum_{i \in S} \nabla U_i(\theta) - \sum_{j=1}^N \nabla U_j(\theta) \quad \text{for SGLD and SGD}, \quad (\text{S9})$$

$$\epsilon(\theta) = \nabla U_0(\theta) - \nabla U_0(\theta^*) + \frac{N}{p} \sum_{i \in S} \{\nabla U_i(\theta) - \nabla U_i(\theta^*)\} - \nabla U(\theta) \quad \text{for SGLDFP}, \quad (\text{S10})$$

where  $S$  is a random subsample of  $\{1, \dots, N\}$  with replacement of size  $p \in \mathbb{N}^*$ . In this setting, the update equation for LMC, SGLD and SGLDFP is given for  $k \in \mathbb{N}$  by

$$\theta_{k+1} = \theta_k - (\nabla U(\theta_k) + \epsilon_{k+1}(\theta_k)) + \sqrt{2\gamma} Z_{k+1}, \quad (\text{S11})$$

where  $(Z_k)_{k \geq 1}$  is a sequence of i.i.d. standard  $d$ -dimensional Gaussian variables and the sequence of vector fields  $(\epsilon_k)_{k \geq 1}$  is associated to a sequence  $(S_k)_{k \geq 1}$  of i.i.d. random subsample of  $\{1, \dots, N\}$  with replacement of size  $p \in \mathbb{N}^*$ . We also denote by  $\bar{\pi} \in \mathcal{P}_2(\mathbb{R}^d)$  the invariant probability measure of LMC, SGLDFP or SGLD.

### 2.2.1 Control of the moments of order 2 and 4 of LMC, SGLDFP and SGLD

**Lemma S1.** Assume **H1**, **H2** and **H3**.

i) For all initial distribution  $\lambda \in \mathcal{P}_2(\mathbb{R}^d)$ ,  $\gamma \in (0, 1/L]$  and  $k \in \mathbb{N}$ ,

$$\mathbb{E} \left[ \|\theta_k - \theta^*\|^2 \right] \leq (1 - m\gamma)^k \int_{\mathbb{R}^d} \|\vartheta - \theta^*\|^2 \lambda(d\vartheta) + (2d)/m$$

where  $(\theta_k)_{k \in \mathbb{N}}$  are the iterates of SGLDFP (5) or LMC (2).

ii) For all initial distribution  $\lambda \in \mathcal{P}_2(\mathbb{R}^d)$ ,  $\gamma \in (0, 1/(2L)]$  and  $k \in \mathbb{N}$ ,

$$\begin{aligned} \mathbb{E} \left[ \|\theta_k - \theta^*\|^2 \right] &\leq (1 - m\gamma)^k \int_{\mathbb{R}^d} \|\vartheta - \theta^*\|^2 \lambda(d\vartheta) + \frac{2d}{m} \\ &\quad + \frac{2\gamma N}{mp} \sum_{i=1}^N \left\| \nabla U_i(\theta^*) - \frac{1}{N} \sum_{j=1}^N \nabla U_j(\theta^*) \right\|^2 \end{aligned}$$

where  $(\theta_k)_{k \in \mathbb{N}}$  are the iterates of SGLD (3).

*Proof.* i). We prove the result for SGLDFP, the case of LMC is identical. Let  $\gamma \in (0, 1/L]$ ,  $(\theta_k)_{k \in \mathbb{N}}$  be the iterates of SGLDFP and  $(\mathcal{F}_k)_{k \in \mathbb{N}}$  the filtration associated to  $(\theta_k)_{k \in \mathbb{N}}$ . By (5), we have for all  $k \in \mathbb{N}$ ,

$$\begin{aligned} \mathbb{E} \left[ \|\theta_{k+1} - \theta^*\|^2 \middle| \mathcal{F}_k \right] &= \|\theta_k - \theta^*\|^2 - 2\gamma \langle \theta_k - \theta^*, \nabla U(\theta_k) - \nabla U(\theta^*) \rangle + 2\gamma d \\ &\quad + \gamma^2 \mathbb{E} \left[ \left\| \nabla U_0(\theta_k) - \nabla U_0(\theta^*) + \frac{N}{p} \sum_{i \in S_{k+1}} \{ \nabla U_i(\theta_k) - \nabla U_i(\theta^*) \} \right\|^2 \middle| \mathcal{F}_k \right] \end{aligned}$$

By **H1** and **H3**,  $\theta \mapsto \nabla U_0(\theta) - \nabla U_0(\theta^*) + (N/p) \sum_{i \in S} \{ \nabla U_i(\theta) - \nabla U_i(\theta^*) \}$  is  $\mathbb{P}$ -a.s.  $L$ -co-coercive and we obtain

$$\mathbb{E} \left[ \|\theta_{k+1} - \theta^*\|^2 \middle| \mathcal{F}_k \right] \leq \{1 - 2m\gamma(1 - \gamma L/2)\} \|\theta_k - \theta^*\|^2 + 2\gamma d.$$

A straightforward induction concludes the proof.

ii). Let  $\gamma \in (0, 1/(2L)]$ ,  $(\theta_k)_{k \in \mathbb{N}}$  be the iterates of SGLD and  $(\mathcal{F}_k)_{k \in \mathbb{N}}$  the filtration associated to  $(\theta_k)_{k \in \mathbb{N}}$ . By (3), we have for all  $k \in \mathbb{N}$ ,

$$\begin{aligned} \mathbb{E} \left[ \|\theta_{k+1} - \theta^*\|^2 \middle| \mathcal{F}_k \right] &= \|\theta_k - \theta^*\|^2 - 2\gamma \langle \theta_k - \theta^*, \nabla U(\theta_k) - \nabla U(\theta^*) \rangle + 2\gamma d \\ &\quad + \gamma^2 \mathbb{E} \left[ \left\| \nabla U_0(\theta_k) + \frac{N}{p} \sum_{i \in S_{k+1}} \nabla U_i(\theta_k) \right\|^2 \middle| \mathcal{F}_k \right] \\ &\leq \|\theta_k - \theta^*\|^2 - 2\gamma \langle \theta_k - \theta^*, \nabla U(\theta_k) - \nabla U(\theta^*) \rangle + 2\gamma d \\ &\quad + 2\gamma^2 \mathbb{E} \left[ \left\| \nabla U_0(\theta_k) - \nabla U_0(\theta^*) + \frac{N}{p} \sum_{i \in S_{k+1}} \{ \nabla U_i(\theta_k) - \nabla U_i(\theta^*) \} \right\|^2 \middle| \mathcal{F}_k \right] \\ &\quad + 2\gamma^2 \mathbb{E} \left[ \left\| \nabla U_0(\theta^*) + \frac{N}{p} \sum_{i \in S_{k+1}} \nabla U_i(\theta^*) \right\|^2 \middle| \mathcal{F}_k \right]. \end{aligned}$$

By **H1** and **H3**,  $\theta \mapsto \nabla U_0(\theta) + (N/p) \sum_{i \in S} \nabla U_i(\theta)$  is  $\mathbb{P}$ -a.s.  $L$ -co-coercive and we obtain

$$\begin{aligned} \mathbb{E} \left[ \|\theta_{k+1} - \theta^*\|^2 \middle| \mathcal{F}_k \right] &\leq \{1 - 2m\gamma(1 - \gamma L)\} \|\theta_k - \theta^*\|^2 + 2\gamma d \\ &\quad + \frac{2\gamma^2 N}{p} \sum_{i=1}^N \left\| \nabla U_i(\theta^*) - \frac{1}{N} \sum_{j=1}^N \nabla U_j(\theta^*) \right\|^2. \end{aligned}$$

A straightforward induction concludes the proof.  $\square$

**Lemma S2.** Assume **H1**, **H2** and **H3**. For all initial distribution  $\lambda \in \mathcal{P}_4(\mathbb{R}^d)$ ,  $\gamma \in (0, 1/\{12(L \vee 1)\})$  and  $k \in \mathbb{N}$ ,

$$\begin{aligned} \mathbb{E} \left[ \|\theta_k - \theta^*\|^4 \right] &\leq (1 - 2m\gamma)^k \int_{\mathbb{R}^d} \|\vartheta - \theta^*\|^4 \lambda(d\vartheta) \\ &\quad + \left\{ 12\gamma^2 \mathbb{E} \left[ \|\epsilon(\theta^*)\|^2 \right] + 2\gamma(2d+1) \right\} k(1 - m\gamma)^{k-1} \int_{\mathbb{R}^d} \|\vartheta - \theta^*\|^2 \lambda(d\vartheta) \\ &\quad + \left\{ \frac{2d+1}{m} + \frac{6\gamma}{m} \mathbb{E} \left[ \|\epsilon(\theta^*)\|^2 \right] \right\}^2 \\ &\quad + \frac{2\gamma d(2+d)}{m} + \frac{4\gamma^3}{m} \mathbb{E} \left[ \|\epsilon(\theta^*)\|^4 \right] + \frac{4\gamma^2(d+2)}{m} \mathbb{E} \left[ \|\epsilon(\theta^*)\|^2 \right]. \end{aligned}$$

where  $(\theta_k)_{k \in \mathbb{N}}$  are the iterates of LMC (2), SGLD (3) or SGLDFP (5).

*Proof.* Let  $\gamma \in (0, 1/\{12(L \vee 1)\})$ ,  $(\theta_k)_{k \in \mathbb{N}}$  be the iterates of LMC (2), SGLD (3) or SGLDFP (5) and  $(\mathcal{F}_k)_{k \in \mathbb{N}}$  be the associated filtration. By developing the square, we have

$$\begin{aligned} \|\theta_1 - \theta^*\|^4 &= \left( \|\theta_0 - \theta^*\|^2 + 2\gamma \|Z_1\|^2 + \gamma^2 \|\nabla U(\theta_0) + \epsilon_1(\theta_0)\|^2 \right. \\ &\quad \left. - 2\gamma \langle \nabla U(\theta_0) + \epsilon_1(\theta_0), \theta_0 - \theta^* \rangle + \sqrt{2\gamma} \langle \theta_0 - \theta^*, Z_1 \rangle - (2\gamma)^{3/2} \langle \nabla U(\theta_0) + \epsilon_1(\theta_0), Z_1 \rangle \right)^2, \end{aligned}$$

and taking the conditional expectation w.r.t.  $\mathcal{F}_0$ ,

$$\begin{aligned} \mathbb{E} \left[ \|\theta_1 - \theta^*\|^4 \middle| \mathcal{F}_0 \right] &= \mathbb{E} \left[ \|\theta_0 - \theta^*\|^4 + 4\gamma^2 \|Z_1\|^4 + \gamma^4 \|\nabla U(\theta_0) + \epsilon_1(\theta_0)\|^4 \right. \\ &\quad + 4\gamma^2 \langle \nabla U(\theta_0) + \epsilon_1(\theta_0), \theta_0 - \theta^* \rangle^2 + 2\gamma \langle \theta_0 - \theta^*, Z_1 \rangle^2 + (2\gamma)^3 \langle \nabla U(\theta_0) + \epsilon_1(\theta_0), Z_1 \rangle^2 \\ &\quad + 4\gamma \|Z_1\|^2 \|\theta_0 - \theta^*\|^2 + 2\gamma^2 \|\theta_0 - \theta^*\|^2 \|\nabla U(\theta_0) + \epsilon_1(\theta_0)\|^2 \\ &\quad - 4\gamma \|\theta_0 - \theta^*\|^2 \langle \nabla U(\theta_0), \theta_0 - \theta^* \rangle + 4\gamma^3 \|Z_1\|^2 \|\nabla U(\theta_0) + \epsilon_1(\theta_0)\|^2 \\ &\quad - 8\gamma^2 \|Z_1\|^2 \langle \nabla U(\theta_0), \theta_0 - \theta^* \rangle - 4\gamma^3 \|\nabla U(\theta_0) + \epsilon_1(\theta_0)\|^2 \langle \nabla U(\theta_0) + \epsilon_1(\theta_0), \theta_0 - \theta^* \rangle \\ &\quad \left. - 8\gamma^2 \langle \theta_0 - \theta^*, Z_1 \rangle \langle \nabla U(\theta_0) + \epsilon_1(\theta_0), Z_1 \rangle \middle| \mathcal{F}_0 \right]. \end{aligned}$$

By **H1** and **H3**,  $\theta \mapsto \nabla U(\theta) + \epsilon_1(\theta)$  is  $\mathbb{P}$ -a.s.  $L$ -co-coercive and we have for all  $\theta \in \mathbb{R}^d$ ,  $\mathbb{P}$ -a.s. ,

$$\begin{aligned} \|\nabla U(\theta) + \epsilon_1(\theta) - \epsilon_1(\theta^*)\|^2 &\leq L \langle \theta - \theta^*, \nabla U(\theta) + \epsilon_1(\theta) - \epsilon_1(\theta^*) \rangle, \\ \|\nabla U(\theta) + \epsilon_1(\theta) - \epsilon_1(\theta^*)\|^4 &\leq L^2 \|\theta - \theta^*\|^2 \langle \theta - \theta^*, \nabla U(\theta) + \epsilon_1(\theta) - \epsilon_1(\theta^*) \rangle. \end{aligned}$$

Combining it with  $\mathbb{E} \left[ \|Z_1\|^4 \right] = d(2+d)$ , we obtain

$$\begin{aligned} \mathbb{E} \left[ \|\theta_1 - \theta^*\|^4 \middle| \mathcal{F}_0, S_1 \right] &\leq \|\theta_0 - \theta^*\|^4 - 4\gamma(1 - 3\gamma L - 2\gamma^3 L^2) \|\theta_0 - \theta^*\|^2 \\ &\quad \times \langle \theta_0 - \theta^*, \nabla U(\theta_0) + \epsilon_1(\theta_0) - \epsilon_1(\theta^*) \rangle + (12\gamma^2 \|\epsilon_1(\theta^*)\|^2 + 2\gamma(2d+1)) \|\theta_0 - \theta^*\|^2 \\ &\quad + 4\gamma^2 d(2+d) + 8\gamma^4 \|\epsilon_1(\theta^*)\|^4 + 8\gamma^3(d+2) \|\epsilon_1(\theta^*)\|^2 \\ &\quad - 8(d+1)\gamma^2(1 - 2\gamma L) \langle \theta_0 - \theta^*, \nabla U(\theta_0) + \epsilon_1(\theta_0) - \epsilon_1(\theta^*) \rangle. \end{aligned}$$

By **H2** and using  $\gamma \leq 1/\{12(L \vee 1)\}$ , we get

$$\begin{aligned} \mathbb{E} \left[ \|\theta_1 - \theta^*\|^4 \middle| \mathcal{F}_0 \right] &\leq (1 - 2m\gamma) \|\theta_0 - \theta^*\|^4 + \left\{ 12\gamma^2 \mathbb{E} \left[ \|\epsilon_1(\theta^*)\|^2 \right] + 2\gamma(2d+1) \right\} \|\theta_0 - \theta^*\|^2 \\ &\quad + 4\gamma^2 d(2+d) + 8\gamma^4 \mathbb{E} \left[ \|\epsilon_1(\theta^*)\|^4 \right] + 8\gamma^3(d+2) \mathbb{E} \left[ \|\epsilon_1(\theta^*)\|^2 \right]. \end{aligned}$$

By a straightforward induction, we have for all  $n \in \mathbb{N}$

$$\begin{aligned} \mathbb{E} \left[ \|\theta_n - \theta^*\|^4 \right] &\leq (1 - 2m\gamma)^n \mathbb{E} \left[ \|\theta_0 - \theta^*\|^4 \right] \\ &\quad + \left\{ 12\gamma^2 \mathbb{E} \left[ \|\epsilon(\theta^*)\|^2 \right] + 2\gamma(2d+1) \right\} \sum_{k=0}^{n-1} (1 - 2m\gamma)^{n-1-k} \mathbb{E} \left[ \|\theta_k - \theta^*\|^2 \right] \\ &\quad + (2m\gamma)^{-1} \left\{ 4\gamma^2 d(2+d) + 8\gamma^4 \mathbb{E} \left[ \|\epsilon(\theta^*)\|^4 \right] + 8\gamma^3(d+2) \mathbb{E} \left[ \|\epsilon(\theta^*)\|^2 \right] \right\} \end{aligned}$$

and by Lemma S1,

$$\begin{aligned}
\mathbb{E} \left[ \|\theta_n - \theta^*\|^4 \right] &\leq (1 - 2m\gamma)^n \int_{\mathbb{R}^d} \|\vartheta - \theta^*\|^4 \lambda(d\vartheta) \\
&\quad + \left\{ 12\gamma^2 \mathbb{E} \left[ \|\epsilon_1(\theta^*)\|^2 \right] + 2\gamma(2d+1) \right\} n(1 - m\gamma)^{n-1} \int_{\mathbb{R}^d} \|\vartheta - \theta^*\|^2 \lambda(d\vartheta) \\
&\quad + \left\{ \frac{2d+1}{m} + \frac{6\gamma}{m} \mathbb{E} \left[ \|\epsilon(\theta^*)\|^2 \right] \right\}^2 \\
&\quad + \frac{2\gamma d(2+d)}{m} + \frac{4\gamma^3}{m} \mathbb{E} \left[ \|\epsilon(\theta^*)\|^4 \right] + \frac{4\gamma^2(d+2)}{m} \mathbb{E} \left[ \|\epsilon(\theta^*)\|^2 \right] .
\end{aligned}$$

□

Thanks to this lemma, we obtain the following corollary. The upper bound for SGD is given by [Dieuleveut et al., 2017, Lemma 13].

**Corollary 3.** *Assume **H1**, **H2** and **H3**.*

i) *Let  $\gamma = \eta/N$  with  $\eta \in (0, 1/\{24(\tilde{L} \vee 1)\})$  and assume that  $\liminf_{N \rightarrow +\infty} N^{-1}m > 0$ . Then,*

$$\begin{aligned}
\int_{\mathbb{R}^d} \|\theta - \theta^*\|^4 \pi_{\text{LMC}}(d\theta) &= d^2 O_{N \rightarrow +\infty}(N^{-2}) , \\
\int_{\mathbb{R}^d} \|\theta - \theta^*\|^4 \pi_{\text{FP}}(d\theta) &= d^2 O_{N \rightarrow +\infty}(N^{-2}) .
\end{aligned}$$

ii) *Let  $\gamma = \eta/N$  with  $\eta \in (0, 1/\{24(\tilde{L} \vee 1)\})$  and assume that  $\liminf_{N \rightarrow +\infty} N^{-1}m > 0$  and that  $N \geq 1/\eta$ . Then,*

$$\int_{\mathbb{R}^d} \|\theta - \theta^*\|^4 \pi_{\text{SGLD}}(d\theta) = d^2 O_{\eta \rightarrow 0}(\eta^2) , \quad \int_{\mathbb{R}^d} \|\theta - \theta^*\|^4 \pi_{\text{SGD}}(d\theta) = d^2 O_{\eta \rightarrow 0}(\eta^2) .$$

### 2.2.2 Proofs of Theorem 6 and Theorem 7

Denote by

$$\eta_0 = \inf_{N \geq 1} \left\{ \frac{N}{12(L \vee 1)} \wedge \frac{2N}{(1+r^2)L} \right\} > 0 , \tag{S12}$$

and set  $\gamma = \eta/N$  with  $\eta \in (0, \eta_0)$ . Let  $\delta \in \{0, 1\}$  be equal to 1 for LMC, SGLDFP and SGLD and 0 for SGD. Let  $\theta_0$  be distributed according to  $\bar{\pi}$ . By (S11) and using a Taylor expansion around  $\theta^*$  for  $\nabla U$ , we obtain

$$\theta_1 - \theta^* = \theta_0 - \theta^* - \gamma \left( \nabla^2 U(\theta^*)(\theta_0 - \theta^*) + \mathcal{R}_1(\theta_0) + \epsilon_1(\theta_0) \right) + \delta \sqrt{2\gamma} Z_1 ,$$

where by **H1**,  $\mathcal{R}_1 : \mathbb{R}^d \rightarrow \mathbb{R}^d$  satisfies

$$\sup_{\theta \in \mathbb{R}^d} \left\{ \|\mathcal{R}_1(\theta)\| / \|\theta - \theta^*\|^2 \right\} \leq L/2 . \tag{S13}$$

Taking the tensor product and the expectation, and using that  $\theta_0, \epsilon_1, Z_1$  are mutually independent, we obtain

$$\begin{aligned}
\mathbb{H} \mathbb{E} \left[ (\theta_0 - \theta^*)^{\otimes 2} \right] &= 2\delta \text{Id} + \gamma \mathbb{E} \left[ \epsilon_1(\theta_0)^{\otimes 2} \right] + \mathbb{E} \left[ \mathcal{R}_1(\theta_0) \otimes \{\theta_0 - \theta^*\} + \{\theta_0 - \theta^*\} \otimes \mathcal{R}_1(\theta_0) \right] \\
&\quad + \gamma \mathbb{E} \left[ \mathcal{R}_1(\theta_0)^{\otimes 2} + \{\nabla^2 U(\theta^*)(\theta_0 - \theta^*)\} \otimes \mathcal{R}_1(\theta_0) + \mathcal{R}_1(\theta_0) \otimes \nabla^2 U(\theta^*)(\theta_0 - \theta^*) \right] . \tag{S14}
\end{aligned}$$

For LMC,  $\epsilon_1$  is the null function and by Corollary 3-i), (S13) and (S14), we obtain (10). Regarding SGLDFP, SGLD and SGD, by a Taylor expansion of  $\epsilon_1$  around  $\theta^*$ , we get for all  $\theta \in \mathbb{R}^d$ ,  $\mathbb{P}$ -a.s. ,

$$\epsilon_1(\theta) = \epsilon_1(\theta^*) + \nabla \epsilon_1(\theta^*)(\theta - \theta^*) + \mathcal{R}_2(\theta)$$

where by **H1**,  $\mathcal{R}_2 : \mathbb{R}^d \rightarrow \mathbb{R}^d$  satisfies

$$\sup_{\theta \in \mathbb{R}^d} \left\{ \|\mathcal{R}_2(\theta)\| / \|\theta - \theta^*\|^2 \right\} \leq L/2 . \tag{S15}$$



Therefore, taking the tensor product and the expectation, we obtain

$$\mathbb{E} [\epsilon_1(\theta_0)^{\otimes 2}] = \mathbb{E} [\epsilon_1(\theta^*)^{\otimes 2}] + (\nabla \epsilon_1(\theta^*))^{\otimes 2} \mathbb{E} [(\theta_0 - \theta^*)^{\otimes 2}] + \mathbb{E} [\mathcal{R}_3(\theta_0)] \quad (\text{S16})$$

where  $\mathcal{R}_3 : \mathbb{R}^d \rightarrow \mathbb{R}^{d \times d}$  is defined for all  $\theta \in \mathbb{R}^d$ ,  $\mathbb{P}$ -a.s. ,

$$\begin{aligned} \mathcal{R}_3(\theta) &= \epsilon_1(\theta^*) \otimes \{\nabla \epsilon_1(\theta^*)(\theta - \theta^*)\} + \{\nabla \epsilon_1(\theta^*)(\theta - \theta^*)\} \otimes \epsilon_1(\theta^*) \\ &+ \{\epsilon_1(\theta^*) + \nabla \epsilon_1(\theta^*)(\theta - \theta^*)\} \otimes \mathcal{R}_2(\theta) + \mathcal{R}_2(\theta) \otimes \{\epsilon_1(\theta^*) + \nabla \epsilon_1(\theta^*)(\theta - \theta^*)\} + \mathcal{R}_2^{\otimes 2}(\theta) . \end{aligned} \quad (\text{S17})$$

Note that  $K = \mathbb{E} [(\nabla \epsilon_1(\theta^*))^{\otimes 2}]$ . For SGLDFP,  $\epsilon_1(\theta^*) = 0$  a.s. By Corollary 3-i), (S13), (S14), (S15), (S16) and (S17), we obtain (11).

Regarding SGLD and SGD, we have  $\mathbb{E} [\epsilon_1(\theta^*)^{\otimes 2}] = (N/p) M$  where  $M$  is defined in (14). By Corollary 3-ii), (S13), (S14), (S15), (S16) and (S17), we obtain (12) and (13).

For the mean of  $\pi_{\text{LMC}}$ ,  $\pi_{\text{FP}}$ ,  $\pi_{\text{SGLD}}$  and  $\pi_{\text{SGD}}$ , by a Taylor expansion around  $\theta^*$  for  $\nabla U$  of order 3, we obtain

$$\begin{aligned} \theta_1 - \theta^* &= \theta_0 - \theta^* - \gamma (\nabla^2 U(\theta^*)(\theta_0 - \theta^*) + (1/2) D^3 U(\theta^*)(\theta_0 - \theta^*)^{\otimes 2} + \mathcal{R}_4(\theta_0) + \epsilon_1(\theta_0)) \\ &+ \delta \sqrt{2\gamma} Z_1 , \end{aligned}$$

where by **H1**,  $\mathcal{R}_4 : \mathbb{R}^d \rightarrow \mathbb{R}^d$  satisfies

$$\sup_{\theta \in \mathbb{R}^d} \left\{ \|\mathcal{R}_4(\theta)\| / \|\theta - \theta^*\|^3 \right\} \leq L/6 . \quad (\text{S18})$$

Taking the expectation and using that  $\theta_1$  is distributed according to  $\bar{\pi}$ , we get

$$\mathbb{E} [\theta_0] - \theta^* = -(1/2) \nabla^2 U(\theta^*) D^3 U(\theta^*) [\mathbb{E} [(\theta_0 - \theta^*)^{\otimes 2}]] - \nabla^2 U(\theta^*)^{-1} \mathbb{E} [\mathcal{R}_4(\theta_0)] .$$

(10), (11), (12), (13), (S18) and Corollary 3 conclude the proof.

### 3 Means and covariance matrices of $\pi_{\text{LMC}}$ , $\pi_{\text{FP}}$ , $\pi_{\text{SGLD}}$ and $\pi_{\text{SGD}}$ in the Bayesian linear regression

In this Section, we provide explicit expressions of the covariance matrices of  $\pi_{\text{LMC}}$ ,  $\pi_{\text{FP}}$ ,  $\pi_{\text{SGLD}}$  and  $\pi_{\text{SGD}}$  in the context of the Bayesian linear regression. In this setting, the algorithms are without bias, *i.e.*

$$\int_{\mathbb{R}^d} \theta \pi_{\text{LMC}}(d\theta) = \int_{\mathbb{R}^d} \theta \pi_{\text{FP}}(d\theta) = \int_{\mathbb{R}^d} \theta \pi_{\text{SGLD}}(d\theta) = \int_{\mathbb{R}^d} \theta \pi_{\text{SGD}}(d\theta) = \int_{\mathbb{R}^d} \theta \pi(d\theta) = \theta^* . \quad (\text{S19})$$

Before giving the expressions of the variances in Theorem S4, we define  $T : \mathbb{R}^{d \times d} \rightarrow \mathbb{R}^{d \times d}$  for all  $A \in \mathbb{R}^{d \times d}$  by

$$T(A) = \mathbb{E} \left[ \left( \frac{\text{Id}}{\sigma_\theta^2} + \frac{N}{p\sigma_y^2} \sum_{i \in S} x_i x_i^T - \Sigma \right)^{\otimes 2} A \right] = \frac{N}{p} \sum_{i=1}^N \left( \frac{x_i x_i^T}{\sigma_y^2} + \frac{\text{Id}}{N\sigma_\theta^2} - \frac{\Sigma}{N} \right)^{\otimes 2} A , \quad (\text{S20})$$

where  $S$  is a random subsample of  $\{1, \dots, N\}$  with replacement of size  $p \in \mathbb{N}^*$ . Note that, in this setting,  $\tilde{L} = \max_{i \in \{1, \dots, N\}} \|x_i\|^2$  and  $m$  is the smallest eigenvalue of  $\Sigma$ . There exists  $r \in [0, L/(\sqrt{pm})]$  such that

$$T \preceq r^2 \Sigma^{\otimes 2} \quad (\text{S21})$$

*i.e.* for all  $A \in \mathbb{R}^{d \times d}$ ,  $\text{Tr}(A^T T \cdot A) \leq r^2 \text{Tr}(A^T \Sigma^{\otimes 2} A)$ . Assuming that  $\liminf_{N \rightarrow +\infty} N^{-1} m > 0$ ,  $r$  can be chosen independently of  $N$ .

**Theorem S4.** *Consider the case of the Bayesian linear regression. We have for all  $\gamma \in (0, 2/L)$*

$$\int_{\mathbb{R}^d} (\theta - \theta^*)^{\otimes 2} \pi_{\text{LMC}}(d\theta) = (\text{Id} \otimes \Sigma + \Sigma \otimes \text{Id} - \gamma \Sigma \otimes \Sigma)^{-1} (2 \text{Id}) ,$$

and for all  $\gamma \in (0, 2/\{(1+r^2)L\})$ ,

$$\begin{aligned} \int_{\mathbb{R}^d} (\theta - \theta^*)^{\otimes 2} \pi_{\text{FP}}(d\theta) &= \{\text{Id} \otimes \Sigma + \Sigma \otimes \text{Id} - \gamma(\Sigma^{\otimes 2} + \text{T})\}^{-1} (2 \text{Id}), \\ \int_{\mathbb{R}^d} (\theta - \theta^*)^{\otimes 2} \pi_{\text{SGLD}}(d\theta) &= \{\text{Id} \otimes \Sigma + \Sigma \otimes \text{Id} - \gamma(\Sigma^{\otimes 2} + \text{T})\}^{-1} \\ &\quad \cdot \left\{ 2 \text{Id} + \frac{\gamma N}{p} \sum_{i=1}^N \left( \frac{(x_i^{\text{T}} \theta^* - y_i) x_i}{\sigma_y^2} + \frac{\theta^*}{\sigma_\theta^2} \right)^{\otimes 2} \right\}, \\ \int_{\mathbb{R}^d} (\theta - \theta^*)^{\otimes 2} \pi_{\text{SGD}}(d\theta) &= \{\text{Id} \otimes \Sigma + \Sigma \otimes \text{Id} - \gamma(\Sigma^{\otimes 2} + \text{T})\}^{-1} \\ &\quad \cdot \frac{\gamma N}{p} \sum_{i=1}^N \left( \frac{(x_i^{\text{T}} \theta^* - y_i) x_i}{\sigma_y^2} + \frac{\theta^*}{\sigma_\theta^2} \right)^{\otimes 2}. \end{aligned}$$

*Proof.* We prove the result for SGLD, the adaptation to the other algorithms is immediate. Let  $\gamma \in (0, 2/\{(1+r^2)L\})$ ,  $\theta_0$  be distributed according to  $\pi_{\text{SGLD}}$  and  $\theta_1$  be given by (3). By definition of  $\pi_{\text{SGLD}}$ ,  $\theta_1$  is distributed according to  $\pi_{\text{SGLD}}$ . We have

$$\begin{aligned} \mathbb{E}[(\theta_1 - \theta^*)^{\otimes 2}] &= \mathbb{E} \left[ \left[ \left\{ \text{Id} - \gamma \left( \frac{\text{Id}}{\sigma_\theta^2} + \frac{N}{p \sigma_y^2} \sum_{i \in S_1} x_i x_i^{\text{T}} \right) \right\} (\theta_0 - \theta^*) \right. \right. \\ &\quad \left. \left. - \gamma \left( \frac{\theta^*}{\sigma_\theta^2} + \frac{N}{p \sigma_y^2} \sum_{i \in S_1} (x_i^{\text{T}} \theta^* - y_i) x_i \right) + \sqrt{2\gamma} Z_1 \right]^{\otimes 2} \right]. \end{aligned}$$

Using that  $\theta_0, S_1, Z_1$  are mutually independent, we obtain

$$\begin{aligned} &\left\{ \text{Id} \otimes \Sigma + \Sigma \otimes \text{Id} - \gamma \mathbb{E} \left[ \left( \frac{\text{Id}}{\sigma_\theta^2} + \frac{N}{p \sigma_y^2} \sum_{i \in S_1} x_i x_i^{\text{T}} \right)^{\otimes 2} \right] \right\} \mathbb{E}[(\theta_0 - \theta^*)^{\otimes 2}] \\ &= 2 \text{Id} + \gamma \mathbb{E} \left[ \left( \frac{\theta^*}{\sigma_\theta^2} + \frac{N}{p \sigma_y^2} \sum_{i \in S_1} (x_i^{\text{T}} \theta^* - y_i) x_i \right)^{\otimes 2} \right] \end{aligned}$$

and

$$\begin{aligned} &\{\text{Id} \otimes \Sigma + \Sigma \otimes \text{Id} - \gamma(\Sigma^{\otimes 2} + \text{T})\} \mathbb{E}[(\theta_0 - \theta^*)^{\otimes 2}] \\ &= 2 \text{Id} + \frac{\gamma N}{p} \sum_{i=1}^N \left( \frac{(x_i^{\text{T}} \theta^* - y_i) x_i}{\sigma_y^2} + \frac{\theta^*}{\sigma_\theta^2} \right)^{\otimes 2}. \end{aligned}$$

On  $\mathbb{R}^{d \times d}$  equipped with the Hilbert-Schmidt inner product,  $\text{Id} \otimes \Sigma + \Sigma \otimes \text{Id} - \gamma(\Sigma^{\otimes 2} + \text{T})$  is a positive definite operator. Indeed, by (S21),

$$\begin{aligned} \text{Id} \otimes \Sigma + \Sigma \otimes \text{Id} - \gamma(\Sigma^{\otimes 2} + \text{T}) &\succeq \text{Id} \otimes \Sigma + \Sigma \otimes \text{Id} - \gamma(1+r^2)\Sigma^{\otimes 2} \\ &= \left( \text{Id} - \gamma \frac{1+r^2}{2} \Sigma \right) \otimes \Sigma + \Sigma \otimes \left( \text{Id} - \gamma \frac{1+r^2}{2} \Sigma \right) \succ 0 \end{aligned}$$

for  $\gamma \in (0, 2/\{(1+r^2)L\})$ .  $\text{Id} \otimes \Sigma + \Sigma \otimes \text{Id} - \gamma(\Sigma^{\otimes 2} + \text{T})$  is thus invertible, which concludes the proof.  $\square$

The covariance matrices make clearly visible the different origins of the noise. The Gaussian noise is responsible of the term  $2 \text{Id}$ , while the multiplicative and additive parts of the stochastic gradient (see (6)) are related to the operator  $\text{T}$  and to the term

$$\frac{\gamma N}{p} \sum_{i=1}^N \left( \frac{(x_i^{\text{T}} \theta^* - y_i) x_i}{\sigma_y^2} + \frac{\theta^*}{\sigma_\theta^2} \right)^{\otimes 2} \quad (\text{S22})$$

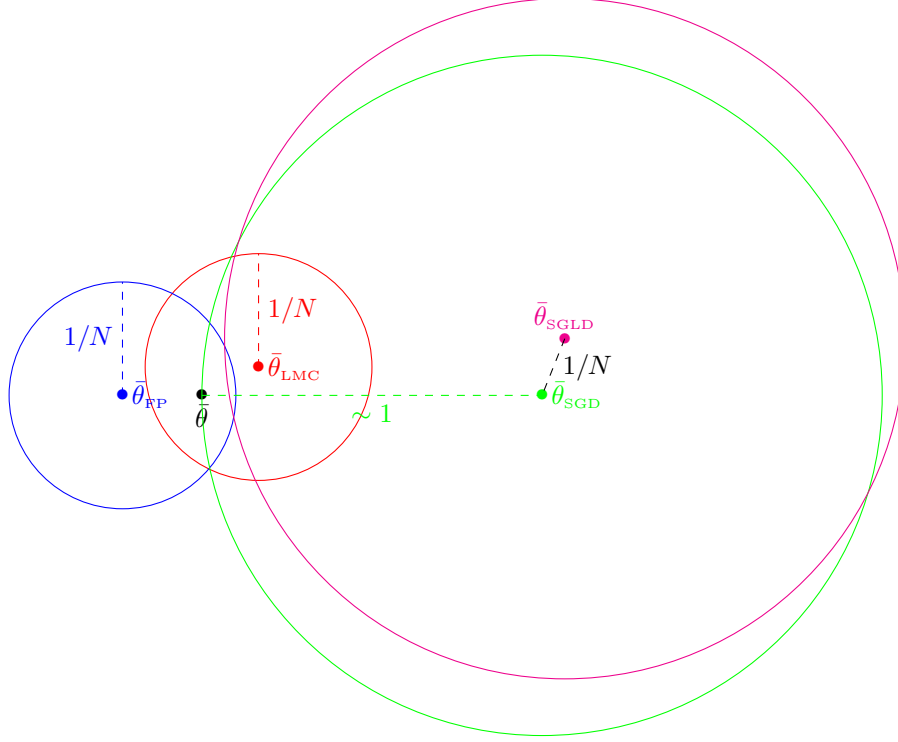

Figure S1: Illustration of Proposition 5, Theorem 6 and Theorem 7 in the asymptotic  $N \rightarrow +\infty$ .  $\bar{\theta}$ ,  $\bar{\theta}_{\text{SGD}}$ ,  $\bar{\theta}_{\text{LMC}}$ ,  $\bar{\theta}_{\text{FP}}$  and  $\bar{\theta}_{\text{SGLD}}$  are the means under the stationary distributions  $\pi$ ,  $\pi_{\text{SGD}}$ ,  $\pi_{\text{LMC}}$ ,  $\pi_{\text{FP}}$  and  $\pi_{\text{SGLD}}$ , respectively. The associated circles indicate the order of magnitude of the covariance matrix. While LMC and SGLDFP concentrate to the posterior mean  $\bar{\theta}$  with a covariance matrix of the order  $1/N$ , SGLD and SGD are at a distance of order  $\sim 1$  of  $\bar{\theta}$  and do not concentrate as  $N \rightarrow +\infty$ .

respectively.

Denote by

$$\eta_1 = \inf_{N \geq 1} \left\{ \frac{2N}{L} \wedge \frac{2N}{(1+r^2)L} \right\} > 0. \quad (\text{S23})$$

**Corollary 5.** *Consider the case of the Bayesian linear regression. Set  $\gamma = \eta/N$  with  $\eta \in (0, \eta_1)$  and assume that  $\liminf_{N \rightarrow +\infty} N^{-1}m > 0$ .*

$$\begin{aligned} \int_{\mathbb{R}^d} \|\theta - \theta^*\|^2 \pi_{\text{LMC}}(d\theta) &= d\Theta_{N \rightarrow +\infty}(N^{-1}), \quad \int_{\mathbb{R}^d} \|\theta - \theta^*\|^2 \pi_{\text{FP}}(d\theta) = d\Theta_{N \rightarrow +\infty}(N^{-1}), \\ \int_{\mathbb{R}^d} \|\theta - \theta^*\|^2 \pi_{\text{SGLD}}(d\theta) &= \eta d\Theta_{N \rightarrow +\infty}(1), \quad \int_{\mathbb{R}^d} \|\theta - \theta^*\|^2 \pi_{\text{SGD}}(d\theta) = \eta d\Theta_{N \rightarrow +\infty}(1). \end{aligned}$$

Recall that, according to the Bernstein-von Mises theorem, the variance of  $\pi$  is of the order  $d/N$  when  $N$  is large. The corollary confirms that  $\pi_{\text{SGLD}}$  is very far from  $\pi$  when the constant step size  $\gamma$  is chosen proportional to  $1/N$ .

## 4 Illustration of Proposition 5, Theorem 6 and Theorem 7

We provide in Figure S1 an illustration of the results of Section 3.2 as the number of data items  $N$  goes to infinity.

## References

N. Brosse, A. Durmus, É. Moulines, and S. Sabanis. The Tamed Unadjusted Langevin Algorithm. *ArXiv e-prints*, Oct. 2017.

- A. Dieuleveut, A. Durmus, and F. Bach. Bridging the Gap between Constant Step Size Stochastic Gradient Descent and Markov Chains. *ArXiv e-prints*, July 2017.
- A. Durmus and E. Moulines. High-dimensional Bayesian inference via the unadjusted Langevin algorithm. *ArXiv e-prints 1605.01559*, May 2016.
- M. Gelbrich. On a formula for the l2 wasserstein metric between measures on euclidean and hilbert spaces. *Mathematische Nachrichten*, 147(1):185–203. doi: 10.1002/mana.19901470121.
- C. Villani. *Optimal transport : old and new*. Grundlehren der mathematischen Wissenschaften. Springer, Berlin, 2009. ISBN 978-3-540-71049-3.
- D. L. Zhu and P. Marcotte. Co-coercivity and its role in the convergence of iterative schemes for solving variational inequalities. *SIAM J. on Optimization*, 6(3):714–726, Mar. 1996. ISSN 1052-6234. doi: 10.1137/S1052623494250415.
